# Supplementary material for: Boron deficiency inhibits root cell elongation via an ethylene/auxin/ROS-dependent pathway in Arabidopsis seedlings
Source: PubMed Central journal article supplement (PMC4473985; doi:10.1093/jxb/erv186), 2015-04-28
Supplement: supp_erv186_jexbot144402_file001.pdf [file supp_erv186_jexbot144402_file001.pdf]

## Supplementary Data

**Title:** Boron deficiency inhibits root cell elongation via an ethylene/auxin/ROS dependent pathway in Arabidopsis seedlings

**Authors:** Juan J. Camacho-Cristóbal, Esperanza M. Martín-Rejano, M. Begoña Herrera-Rodríguez, M. Teresa Navarro-Gochicoa, Jesús Rexach, and Agustín González-Fontes

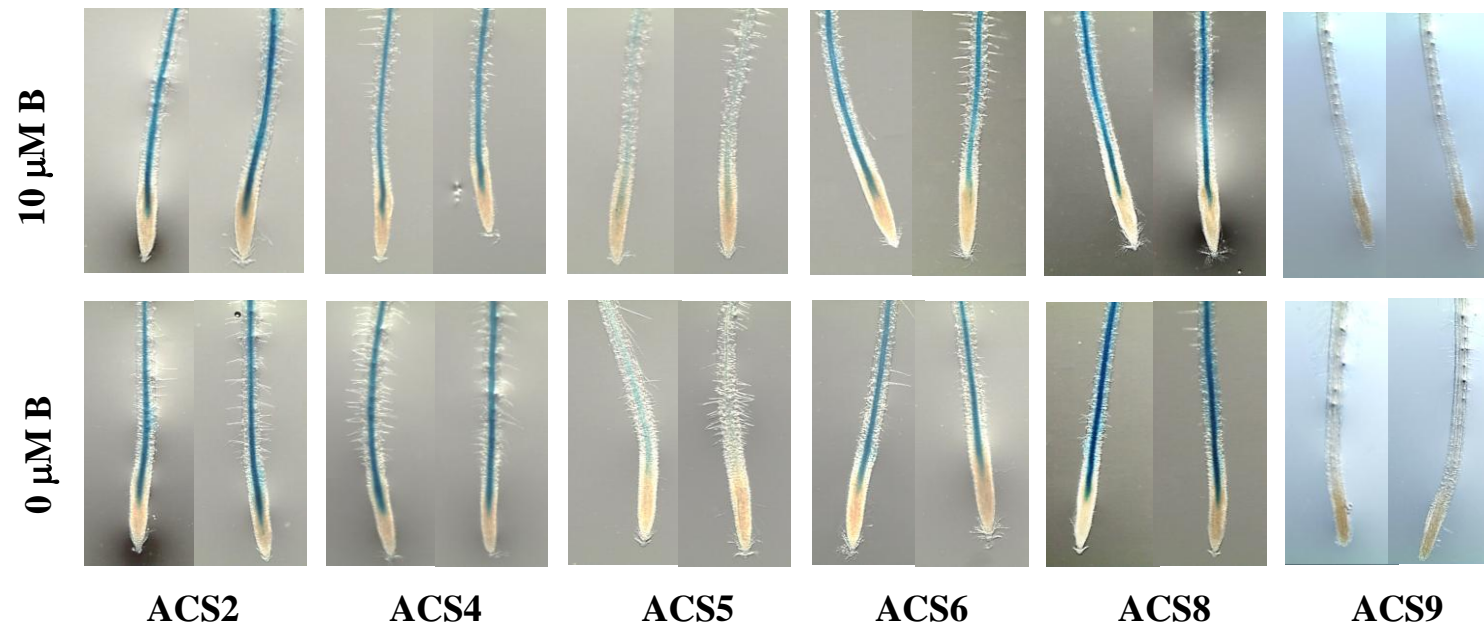

**Figure S1.** GUS expression in roots of proACS[2...9]::GUS seedlings grown in a B deficient (0  $\mu$ M B) or control (10  $\mu$ M B) medium during 4 h. Images are representative individuals of two independent experiments with at least 10 seedlings examined for each experiment.

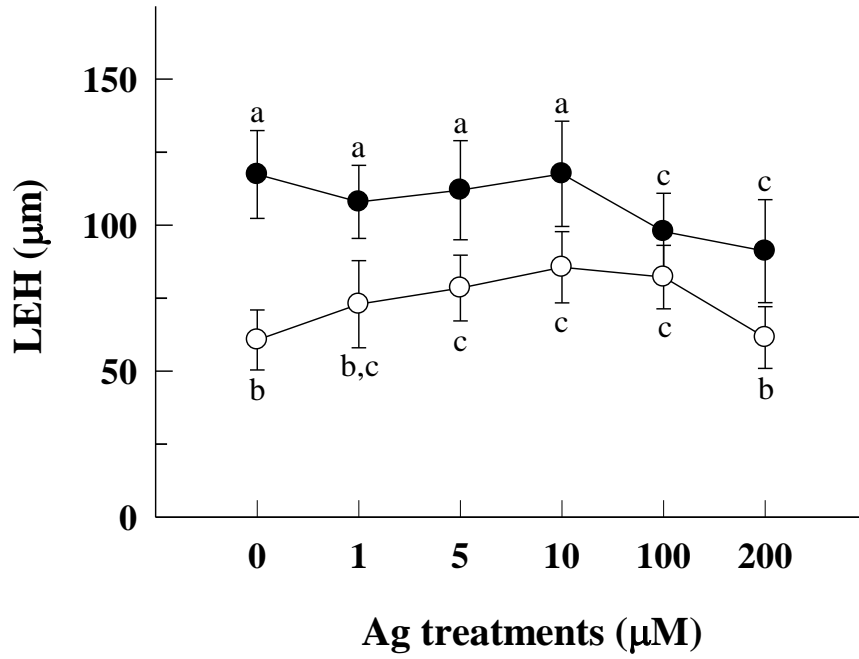

**Figure S2.** Dose-response curve of LEH to external  $\text{Ag}^+$  concentrations in control (filled circle) and B-deficient (open circle) roots after 4 h of B treatments. The results are given as means  $\pm$  SD ( $n = 12$  separate plants). Different letters are used to indicate means that differ significantly ( $P < 0.001$ ) according to Student's t-test.
